# Supplementary material
Source: publisher site journal article supplement (https://www.dovepress.com/article/182180)
Supplement: Supplementary file 1 [file get_supplementary_file.php]

## Supplementary documents

### Supplementary Tables

**Table S1** In vitro antimicrobial susceptibilities of *Enterobacteriaceae* strains causing IAIs between 2007 and 2016

| Antibiotics | R%   | I%   | S%   | MIC <sub>50</sub> | MIC <sub>90</sub> | MIC range |
|-------------|------|------|------|-------------------|-------------------|-----------|
| MEM         | 2.0  | 0.1  | 97.9 | 0.032             | 0.5               | 0.008-32  |
| IPM         | 1.5  | 0.2  | 98.3 | 0.125             | 1                 | 0.008-32  |
| TGC         | 0.1  | 0.1  | 99.8 | 0.25              | 0.5               | 0.064-4   |
| AMK         | 5.4  | 1.2  | 93.4 | 2                 | 8                 | 0.016-256 |
| CSL         | 11.2 | 12.2 | 76.6 | 8                 | 64                | 0.016-256 |
| FEP         | 29.5 | 22.6 | 47.9 | 4                 | 64                | 0.008-512 |
| CAZ         | 28.4 | 7.9  | 63.7 | 2                 | 64                | 0.032-256 |
| FOX         | 24.9 | 15.3 | 59.8 | 8                 | 64                | 0.064-256 |
| CTX         | 66.2 | 0.9  | 32.9 | 32                | 256               | 0.016-256 |
| CRO         | 65.6 | 0.5  | 33.9 | 32                | 256               | 0.016-256 |
| MNO         | 27.2 | 13.8 | 59.0 | 4                 | 32                | 0.016-256 |
| LVX         | 65.1 | 4.4  | 30.5 | 16                | 32                | 0.016-128 |
| CIP         | 68.9 | 1.4  | 29.7 | 32                | 64                | 0.004-256 |

**Abbreviations:** IAI, intra-abdominal infection; R%, the percentage of antibiotic resistance; I%, the percentage of antibiotic intermediary; S%, the percentage of antibiotic susceptibility; MIC, minimal inhibitory concentrations; AMK, amikacin; CAZ, ceftazidime; CIP, ciprofloxacin; CRO, ceftriaxone; CSL, cefoperazone/sulbactam; CTX, cefotaxime; FEP, cefepime; FOX, ceftiofur; IPM, imipenem; LVX, levofloxacin; MEM, meropenem; MNO, minocycline; TGC, tigecycline.

**Table S2** In vitro antimicrobial susceptibilities of *Escherichia coli* strains causing IAIs between 2007 and 2016

| Antibiotics | <i>Escherichia coli</i> , ESBL(+)<br>(n=491) |      |      |                   |                   |            | <i>Escherichia coli</i> , ESBL(-)<br>(n=482) |      |      |                   |                   |           |
|-------------|----------------------------------------------|------|------|-------------------|-------------------|------------|----------------------------------------------|------|------|-------------------|-------------------|-----------|
|             | R%                                           | I%   | S%   | MIC <sub>50</sub> | MIC <sub>90</sub> | MIC range  | R%                                           | I%   | S%   | MIC <sub>50</sub> | MIC <sub>90</sub> | MIC range |
| FOX         | 28.2                                         | 21.4 | 50.4 | 8                 | 64                | 0.064-256  | 21.6                                         | 9.3  | 69.1 | 8                 | 128               | 0.125-256 |
| CRO         | 99.2                                         | 0    | 0.8  | 128               | 256               | 0.064-256  | 32.0                                         | 1.0  | 67.0 | 0.064             | 64                | 0.016-256 |
| CSL         | 19.5                                         | 20.2 | 60.3 | 16                | 64                | 0.032-256  | 2.9                                          | 4.4  | 92.7 | 1                 | 16                | 0.032-256 |
| CTX         | 99.2                                         | 0    | 0.8  | 128               | 256               | 0.032-256  | 33.2                                         | 1.9  | 64.9 | 0.125             | 64                | 0.016-256 |
| CAZ         | 46.7                                         | 12.8 | 40.5 | 8                 | 64                | 0.25-256   | 10.2                                         | 2.9  | 86.9 | 0.25              | 16                | 0.032-256 |
| FEP         | 53.4                                         | 34.7 | 11.9 | 16                | 64                | 0.032-1328 | 4.7                                          | 10.2 | 85.1 | 0.064             | 4                 | 0.008-256 |
| IPM         | 1.6                                          | 0.1  | 98.3 | 0.125             | 1                 | 0.032-32   | 0.6                                          | 0.2  | 99.2 | 0.032             | 0.5               | 0.008-32  |
| MEM         | 2.0                                          | 0.2  | 97.8 | 0.064             | 1                 | 0.016-32   | 1.0                                          | 0.3  | 98.7 | 0.016             | 0.032             | 0.008-32  |
| CIP         | 86.1                                         | 1.2  | 12.7 | 32                | 64                | 0.008-256  | 52.1                                         | 1.4  | 46.5 | 4                 | 32                | 0.008-64  |
| LVX         | 81.3                                         | 4.8  | 13.9 | 16                | 32                | 0.016-128  | 49.2                                         | 3.9  | 46.9 | 4                 | 32                | 0.016-64  |
| AMK         | 7.7                                          | 1.6  | 90.7 | 2                 | 16                | 0.125-256  | 3.1                                          | 0.8  | 96.1 | 2                 | 4                 | 0.125-256 |
| MNO         | 34.9                                         | 12.8 | 52.3 | 4                 | 32                | 0.125-256  | 19.7                                         | 14.7 | 65.6 | 2                 | 16                | 0.016-128 |
| TGC         | 0                                            | 0    | 100  | 0.25              | 0.5               | 0.064-2    | 0.2                                          | 0.2  | 99.6 | 0.25              | 0.5               | 0.064-8   |

**Abbreviations:** IAI, intra-abdominal infection; ESBL, extended-spectrum beta-lactamase; R%, the percentage of antibiotic resistance; I%, the percentage of antibiotic intermediary; S%, the percentage of antibiotic susceptibility; MIC, minimal inhibitory concentrations; AMK, amikacin; CAZ, ceftazidime; CIP, ciprofloxacin; CRO, ceftriaxone; CSL, cefoperazone/sulbactam; CTX, cefotaxime; FEP, cefepime; FOX, ceftioxitin; IPM, imipenem; LVX, levofloxacin; MEM, meropenem; MNO, minocycline; TGC, tigecycline.

**Table S3** In vitro antimicrobial susceptibilities of *Klebsiella pneumoniae* strains causing IAIs between 2007 and 2016

| Antibiotics | <i>Klebsiella pneumoniae</i> , ESBL(+)<br>(n=77) |      |      |                   |                   |           | <i>Klebsiella pneumoniae</i> , ESBL(-)<br>(n=237) |      |      |                   |                   |           |
|-------------|--------------------------------------------------|------|------|-------------------|-------------------|-----------|---------------------------------------------------|------|------|-------------------|-------------------|-----------|
|             | R%                                               | I%   | S%   | MIC <sub>50</sub> | MIC <sub>90</sub> | MIC range | R%                                                | I%   | S%   | MIC <sub>50</sub> | MIC <sub>90</sub> | MIC range |
| FOX         | 14.3                                             | 11.7 | 74.0 | 4                 | 32                | 2-256     | 28.0                                              | 6.7  | 65.3 | 4                 | 256               | 0.12-256  |
| CRO         | 89.6                                             | 6.5  | 3.9  | 64                | 256               | 0.032-256 | 23.7                                              | 0.9  | 75.4 | 0.064             | 128               | 0.016-256 |
| CSL         | 28.6                                             | 14.3 | 57.1 | 16                | 64                | 0.5-256   | 10.6                                              | 4.6  | 84.8 | 0.5               | 64                | 0.016-256 |
| CTX         | 90.9                                             | 2.6  | 6.5  | 64                | 256               | 0.032-256 | 25.4                                              | 0.9  | 73.7 | 0.064             | 64                | 0.016-256 |
| CAZ         | 50.7                                             | 6.4  | 42.9 | 8                 | 128               | 1-256     | 16.5                                              | 2.6  | 80.9 | 0.25              | 64                | 0.016-256 |
| FEP         | 40.9                                             | 26.7 | 32.4 | 8                 | 32                | 0.032-256 | 9.5                                               | 7.6  | 82.9 | 0.064             | 8                 | 0.016-256 |
| IPM         | 6.5                                              | 1.3  | 92.2 | 0.25              | 1                 | 0.064-32  | 0.8                                               | 0.8  | 98.4 | 0.125             | 1                 | 0.008-32  |
| MEM         | 7.8                                              | 0.2  | 92.0 | 0.125             | 0.5               | 0.016-32  | 1.3                                               | 0.5  | 98.2 | 0.032             | 0.25              | 0.008-32  |
| CIP         | 50.7                                             | 9.0  | 40.3 | 2                 | 64                | 0.016-64  | 22.6                                              | 5.5  | 71.9 | 0.125             | 32                | 0.016-64  |
| LVX         | 45.5                                             | 5.1  | 49.4 | 2                 | 32                | 0.032-128 | 17.0                                              | 5.5  | 77.5 | 0.25              | 32                | 0.008-128 |
| AMK         | 16.9                                             | 1.3  | 81.8 | 2                 | 256               | 0.125-256 | 8.0                                               | 0    | 92.0 | 1                 | 4                 | 0.032-256 |
| MNO         | 46.8                                             | 16.8 | 36.4 | 8                 | 64                | 0.125-256 | 30.5                                              | 16.5 | 53.0 | 4                 | 64                | 0.125-256 |
| TGC         | 1.3                                              | 3.9  | 94.8 | 0.5               | 2                 | 0.125-8   | 1.7                                               | 4.7  | 93.6 | 0.5               | 2                 | 0.125-16  |

**Abbreviations:** IAI, intra-abdominal infection; ESBL, extended-spectrum beta-lactamase; R%, the percentage of antibiotic resistance; I%, the percentage of antibiotic intermediary; S%, the percentage of antibiotic susceptibility; MIC, minimal inhibitory concentrations; AMK, amikacin; CAZ, ceftazidime; CIP, ciprofloxacin; CRO, ceftriaxone; CSL, cefoperazone/sulbactam; CTX, cefotaxime; FEP, cefepime; FOX, ceftioxitin; IPM, imipenem; LVX, levofloxacin; MEM, meropenem; MNO, minocycline; TGC, tigecycline.

**Table S4** In vitro antimicrobial susceptibilities of *Pseudomonas aeruginosa* and *Acinetobacter baumannii* strains causing IAIs between 2007 and 2016

| Antibiotics | <i>Pseudomonas aeruginosa</i><br>(n=230) |      |      |                   |                   |           | <i>Acinetobacter baumannii</i><br>(n=186) |      |      |                   |                   |           |
|-------------|------------------------------------------|------|------|-------------------|-------------------|-----------|-------------------------------------------|------|------|-------------------|-------------------|-----------|
|             | R%                                       | I%   | S%   | MIC <sub>50</sub> | MIC <sub>90</sub> | MIC range | R%                                        | I%   | S%   | MIC <sub>50</sub> | MIC <sub>90</sub> | MIC range |
| TZP         | 24.8                                     | 15.2 | 60.0 | 8                 | 128               | 1-256     | 74.2                                      | 2.1  | 23.7 | 256               | 256               | 0.016-256 |
| CAZ         | 25.8                                     | 4.4  | 69.8 | 4                 | 64                | 0.125-256 | 75.3                                      | 1.0  | 23.7 | 64                | 256               | 0.125-256 |
| FEP         | 19.6                                     | 14.0 | 66.4 | 4                 | 64                | 0.032-256 | 73.1                                      | 2.9  | 24.0 | 64                | 256               | 0.032-256 |
| IPM         | 33.5                                     | 8.7  | 57.8 | 2                 | 32                | 0.125-256 | 69.4                                      | 1.0  | 29.6 | 32                | 64                | 0.125-256 |
| MEM         | 28.3                                     | 8.3  | 63.4 | 1                 | 16                | 0.016-256 | 67.7                                      | 2.2  | 30.1 | 32                | 64                | 0.008-128 |
| CIP         | 26.5                                     | 2.6  | 70.9 | 0.25              | 32                | 0.008-64  | 75.8                                      | 0.5  | 23.7 | 32                | 32                | 0.032-32  |
| LVX         | 27.8                                     | 5.7  | 66.5 | 1                 | 32                | 0.064-32  | 59.7                                      | 17.7 | 22.6 | 8                 | 16                | 0.064-32  |
| AMK         | 14.8                                     | 1.8  | 83.4 | 4                 | 256               | 0.125-256 | 68.7                                      | 1.0  | 30.3 | 256               | 256               | 0.125-256 |
| MNO         | -                                        | -    | -    | 32                | 128               | 2-256     | 23.7                                      | 9.1  | 67.2 | 4                 | 16                | 0.032-32  |
| TGC         | -                                        | -    | -    | 8                 | 32                | 1-32      | 2.7                                       | 12.9 | 84.4 | 2                 | 4                 | 0.125-16  |

**Abbreviations:** IAI, intra-abdominal infection; R%, the percentage of antibiotic resistance; I%, the percentage of antibiotic intermediary; S%, the percentage of antibiotic susceptibility; MIC, minimal inhibitory concentrations; AMK, amikacin; CAZ, ceftazidime; CIP, ciprofloxacin; FEP, cefepime; IPM, imipenem; LVX, levofloxacin; MEM, meropenem; MNO, minocycline; TZP, piperacillin/tazobactam; TGC, tigecycline.

**Table S5** In vitro antimicrobial susceptibilities of MRSA and MSSA strains causing IAIs between 2007 and 2016

| Antibiotics | MRSA (n=51) |      |      |                   |                   |           | MSSA (n=89) |     |      |                   |                   |           |
|-------------|-------------|------|------|-------------------|-------------------|-----------|-------------|-----|------|-------------------|-------------------|-----------|
|             | R%          | I%   | S%   | MIC <sub>50</sub> | MIC <sub>90</sub> | MIC range | R%          | I%  | S%   | MIC <sub>50</sub> | MIC <sub>90</sub> | MIC range |
| CIP         | 89.7        | 1.1  | 9.2  | 64                | 64                | 0.25-64   | 9.8         | 3.9 | 86.3 | 0.5               | 2                 | 0.125-32  |
| LVX         | 89.7        | 0    | 10.3 | 32                | 64                | 0.125-128 | 9.8         | 0   | 90.2 | 0.25              | 1                 | 0.125-8   |
| MFX         | 87.4        | 2.3  | 10.3 | 8                 | 8                 | 0.016-64  | 9.8         | 0   | 90.2 | 0.032             | 0.125             | 0.008-8   |
| CHL         | 6.9         | 6.9  | 86.2 | 8                 | 16                | 4-64      | 7.9         | 3.9 | 88.2 | 8                 | 16                | 1-64      |
| ERY         | 83.9        | 2.3  | 13.8 | 256               | 256               | 0.125-256 | 60.8        | 2.0 | 37.2 | 256               | 256               | 0.125-256 |
| TEC         | 0           | 0    | 100  | 2                 | 2                 | 0.25-4    | 0           | 0   | 100  | 1                 | 1                 | 0.25-4    |
| VAN         | 0           | 0    | 100  | 1                 | 1                 | 0.25-2    | 0           | 0   | 100  | 0.5               | 1                 | 0.25-1    |
| SXT         | 14.9        | 0    | 85.1 | 0.25              | 16                | 0.032-64  | 5.9         | 0   | 94.1 | 0.125             | 2                 | 0.016-64  |
| RIF         | 58.6        | 1.2  | 40.2 | 256               | 256               | 0.002-256 | 2.0         | 0   | 98.0 | 0.008             | 0.016             | 0.002-128 |
| MNO         | 3.5         | 32.1 | 64.4 | 4                 | 8                 | 0.064-32  | 0           | 0   | 100  | 0.125             | 0.125             | 0.032-2   |

**Abbreviations:** IAI, intra-abdominal infection; MRSA, methicillin-resistant *Staphylococcus aureus*; MSSA, methicillin-susceptible *Staphylococcus aureus*; R%, the percentage of antibiotic resistance; I%, the percentage of antibiotic intermediary; S%, the percentage of antibiotic susceptibility; MIC, minimal inhibitory concentrations; CHL, chloramphenicol; CIP, ciprofloxacin; ERY, erythromycin; LVX, levofloxacin; MFX, moxifloxacin; MNO, minocycline; RIF, rifampicin; SXT, sulfamethoxazole; TEC, teicoplanin; VAN, vancomycin.

**Table S6** In vitro antimicrobial susceptibilities of *Enterococcus faecalis* and *Enterococcus faecium* strains causing IAIs between 2007 and 2016

| Antibiotics | <i>Enterococcus faecalis</i><br>(n=175) |      |      |                   |                   |           | <i>Enterococcus faecium</i><br>(n=312) |      |      |                   |                   |           |
|-------------|-----------------------------------------|------|------|-------------------|-------------------|-----------|----------------------------------------|------|------|-------------------|-------------------|-----------|
|             | R%                                      | I%   | S%   | MIC <sub>50</sub> | MIC <sub>90</sub> | MIC range | R%                                     | I%   | S%   | MIC <sub>50</sub> | MIC <sub>90</sub> | MIC range |
| AMP         | 6.5                                     | 0    | 93.5 | 1                 | 8                 | 0.032-256 | 84.0                                   | 0    | 16.0 | 128               | 256               | 0.125-256 |
| IPM         | -                                       | -    | -    | 2                 | 8                 | 0.016-256 | -                                      | -    | -    | 256               | 256               | 0.125-256 |
| CIP         | 36.6                                    | 9.7  | 53.7 | 1                 | 64                | 0.25-64   | 84.9                                   | 3.6  | 11.5 | 32                | 64                | 0.125-64  |
| LVX         | 35.1                                    | 1.1  | 63.8 | 2                 | 64                | 0.25-128  | 81.9                                   | 2.6  | 15.5 | 64                | 64                | 0.25-128  |
| ERY         | 71.7                                    | 10.4 | 17.9 | 256               | 256               | 0.064-256 | 82.2                                   | 9.9  | 7.9  | 256               | 256               | 0.032-256 |
| TEC         | 0                                       | 0.6  | 99.4 | 0.25              | 0.5               | 0.032-32  | 1.0                                    | 0.3  | 98.7 | 0.5               | 0.5               | 0.064-32  |
| VAN         | 0                                       | 0    | 100  | 1                 | 2                 | 0.125-4   | 1.9                                    | 0.7  | 97.4 | 0.5               | 2                 | 0.25-128  |
| MNO         | 52.0                                    | 13.3 | 34.7 | 16                | 16                | 0.032-32  | 27.6                                   | 10.9 | 61.5 | 0.125             | 16                | 0.032-32  |

**Abbreviations:** IAI, intra-abdominal infection; R%, the percentage of antibiotic resistance; I%, the percentage of antibiotic intermediary; S%, the percentage of antibiotic susceptibility; MIC, minimal inhibitory concentrations; AMP, ampicillin; CIP, ciprofloxacin; ERY, erythromycin; IPM, imipenem; LVX, levofloxacin; MNO, minocycline; TEC, teicoplanin; VAN, vancomycin.

Supplementary Figures

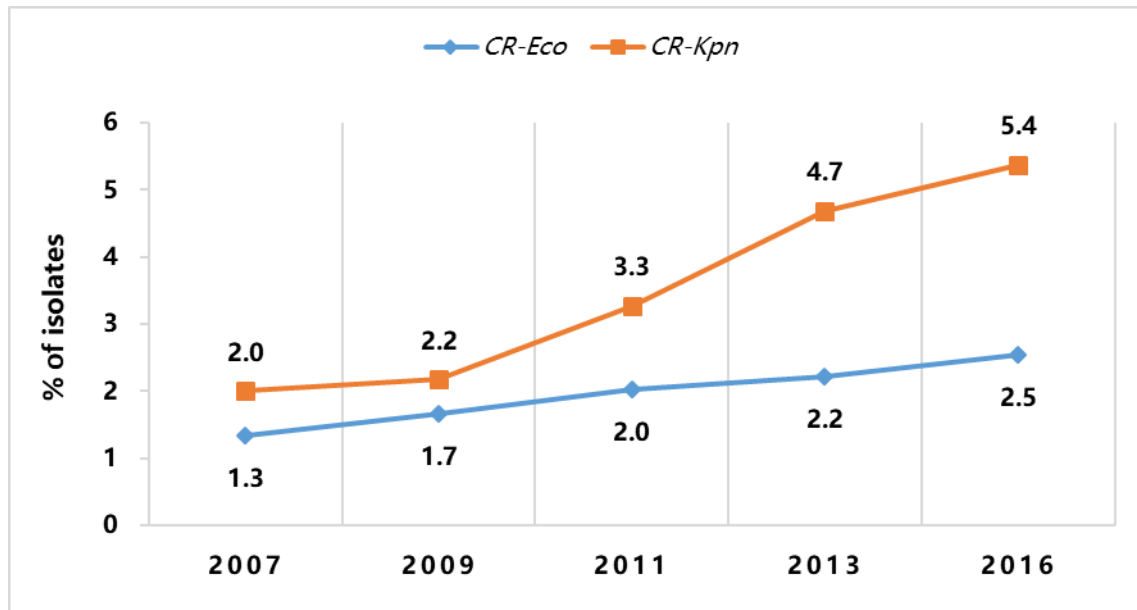

**Figure S1** Rates of CR-Eco and CR-Kpn isolates causing IAIs between 2007 and 2016.

**Abbreviations:** CR-Eco, carbapenem-resistant *Escherichia coli*; CR-Kpn, carbapenem-resistant *Klebsiella pneumoniae*.

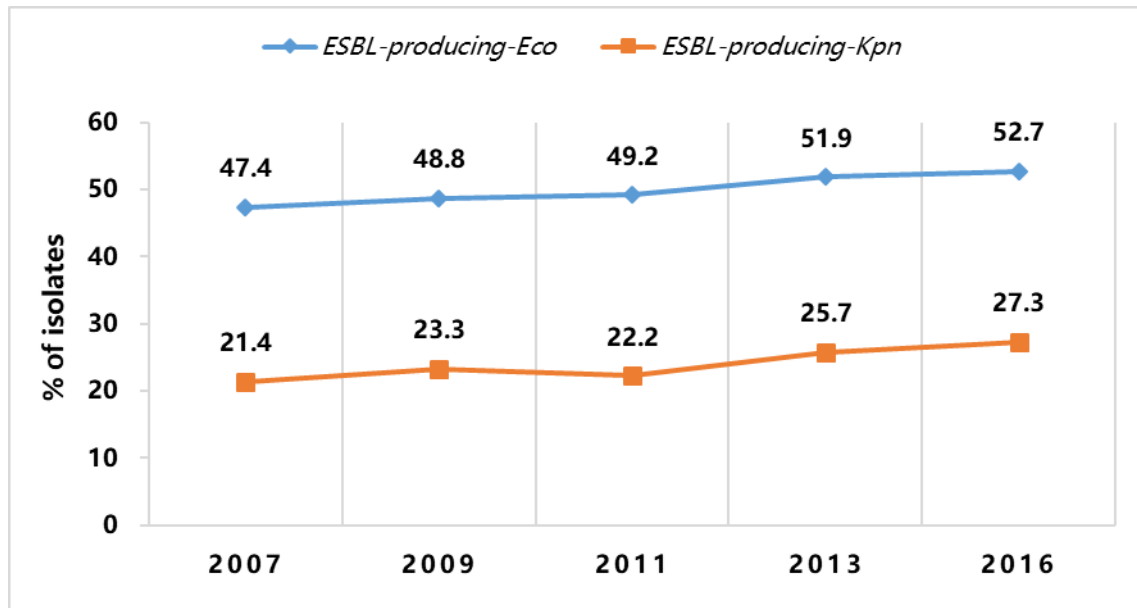

**Figure S2** Rates of ESBL-producing-*Eco* and ESBL-producing-*Kpn* isolates causing IAIs between 2007 and 2016.

**Abbreviations:** ESBL, extended-spectrum  $\beta$ -lactamase; *Eco*, *Escherichia coli*; *Kpn*, *Klebsiella pneumoniae*.



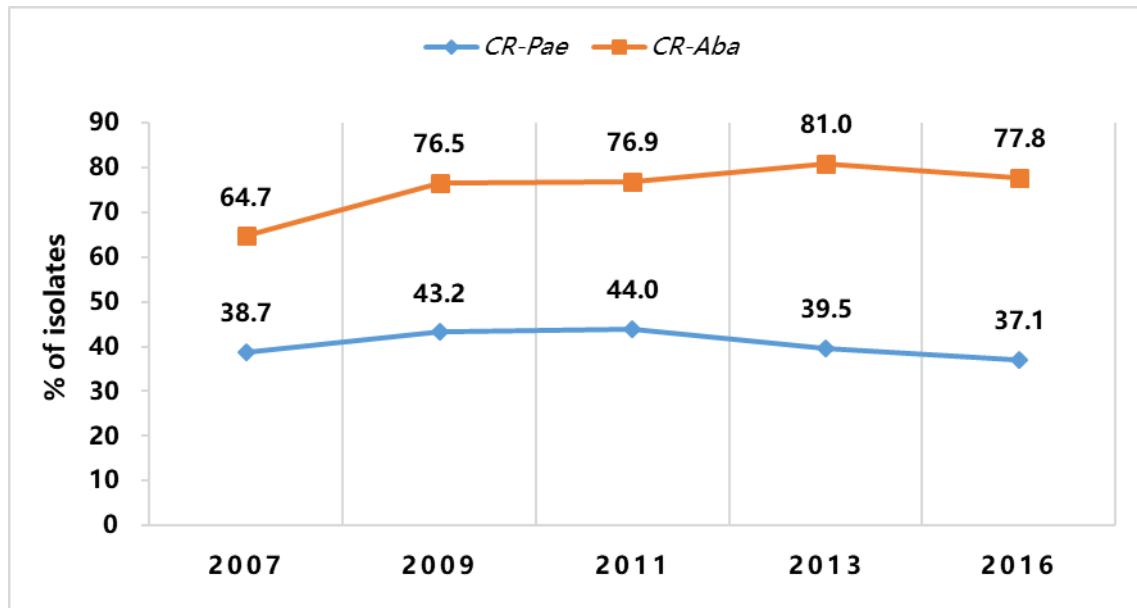

**Figure S3** Rates of CR-*Pae* and CR-*Aba* isolates causing IAIs between 2007 and 2016.

**Abbreviations:** CR-*Pae*, carbapenem-resistant *Pseudomonas aeruginosa*; CR-*Aba*, carbapenem-resistant *Acinetobacter baumannii*.

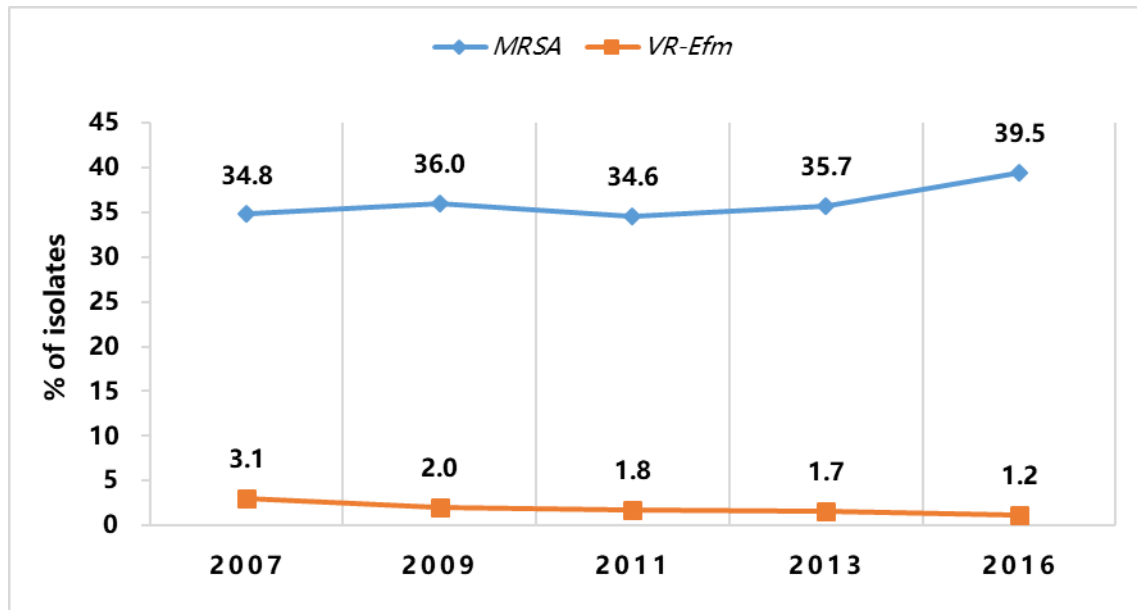

**Figure S4** Rates of MRSA and VR-*Efm* isolates causing IAIs between 2007 and 2016.  
**Abbreviations:** MRSA, methicillin-resistant *Staphylococcus aureus*; VR-*Efm*, vancomycin-resistant *Enterococcus faecium*.
